# Supplementary material for: Loss of Cultural and Functional Diversity Associated With Birds Across the Urbanization Gradient in a Tropical City
Source: Frontiers journal article supplement (doi:10.3389/fevo.2021.615797), 2021-05-28
Supplement: Data_Sheet_1.XLSX [file Data_Sheet_1.XLSX]

## Sheet: species composition
	Alipiopsitta_xanthops	Amazilia_fimbriata	Amazona_aestiva	Ammodramus_humeralis	Ara_ararauna	Ara_chloropterus	Aramides_cajaneus	Aramus_guarauna	Athene_cunicularia	Brotogeris_chiriri	Butorides_striata	Caracara_plancus	Cariama_cristata	Cathartes_aura	Chloroceryle_americana	Chlorostilbon_lucidus	Clibanornis_rectirostris	Coereba_flaveola	Colaptes_campestris	Colaptes_melanochloros	Columba_livia	Columbina_picui	Columbina_squammata	Columbina_talpacoti_	Crotophaga_ani	Cyanerpes_cyaneus	Cyclarhis_gujanensis	Diopsittaca_nobilis	Elaenia_flavogaster	Empidonomus_varius	Eupetomena_macroura	Euphonia_chlorotica	Eupsittula_aurea_	Falco_sparverius	Forpus_xanthopterygius	Furnarius_rufus	Gnorimopsar_chopi	Griseotyrannus_aurantioatrocristatus	Guira_guira	Herpsilochmus_longirostris	Hylocharis_chrysura	Icterus_cayanensis	Leptotila_verreauxi	Megaceryle_torquata	Melanerpes_candidus	Mimus_saturninus	Molothrus_bonariensis	Myiarchus_ferox	Myiodynastes_maculatus
P1	13	0	0	0	2	0	0	0	0	4	0	0	0	0	0	0	0	2	0	0	13	2	0	1	0	0	0	0	0	0	0	0	5	0	0	4	0	0	0	0	0	0	0	0	0	0	0	0	0
P2	0	0	0	0	0	0	0	0	0	8	0	1	0	0	0	0	0	2	0	0	12	6	2	7	2	0	0	0	0	0	2	0	8	0	0	11	0	0	0	0	0	0	0	0	0	3	0	0	0
P3	0	0	0	0	0	0	0	0	0	5	0	0	0	0	0	0	0	0	0	0	15	5	0	1	0	0	0	0	0	0	1	0	0	0	0	2	0	0	0	0	0	0	0	0	0	0	0	0	0
P4	0	0	0	0	0	0	0	0	0	8	0	0	0	0	0	2	0	0	0	0	6	4	0	17	4	0	1	1	0	0	0	0	0	0	0	3	0	0	0	0	0	0	0	0	0	0	0	0	0
P5	0	0	0	0	0	0	0	0	0	0	0	0	0	0	0	0	0	0	0	0	2	1	0	0	4	0	0	0	0	0	0	0	0	0	0	4	0	0	0	0	0	0	0	0	0	0	0	0	0
P6	0	0	0	0	0	0	0	0	0	4	0	0	0	0	0	0	0	0	0	0	13	9	0	2	0	0	1	0	0	0	1	0	0	0	0	4	0	0	0	0	0	0	0	0	0	2	0	0	0
P7	0	0	0	0	0	0	0	0	0	3	0	0	0	0	0	0	0	0	0	0	0	2	0	7	0	0	0	0	0	0	1	0	0	0	0	4	0	0	1	0	0	0	0	0	0	0	0	0	0
P8	0	0	0	0	0	0	0	0	0	7	0	0	0	0	0	0	0	2	0	0	3	6	0	3	0	0	0	0	0	0	3	0	2	0	0	8	0	0	0	0	0	0	0	0	0	3	0	0	0
P9	0	0	0	0	0	0	0	0	0	8	0	0	0	0	0	0	0	0	0	0	6	0	0	0	0	0	0	0	0	0	1	2	2	0	0	0	0	0	0	0	0	0	0	0	0	0	0	0	0
P10	1	0	0	0	0	0	0	0	0	2	0	0	0	0	0	0	0	0	0	0	17	9	0	5	0	0	0	0	0	0	1	0	2	0	0	5	0	0	0	0	0	0	0	0	0	1	0	0	0
P11	0	0	0	0	2	0	0	0	0	6	0	0	0	0	0	0	0	1	0	0	0	2	0	4	0	0	0	0	0	0	0	0	2	0	0	4	0	0	0	0	0	0	0	0	0	4	0	0	1
P12	0	0	0	0	0	0	0	0	0	7	0	1	0	0	0	0	0	2	0	2	27	1	1	9	6	0	0	2	0	0	1	4	9	0	5	7	0	0	0	0	0	0	0	0	0	0	0	0	0
P13	0	0	0	0	2	0	0	0	0	0	0	0	0	0	0	0	0	0	0	0	15	1	0	0	0	0	0	0	0	1	2	1	0	0	0	6	0	0	0	0	0	0	0	0	0	1	0	0	0
P14	0	0	0	0	3	13	0	0	0	16	0	0	0	0	0	0	0	0	0	0	34	0	0	7	0	0	0	0	0	0	3	2	0	0	0	8	0	0	0	0	0	0	0	0	0	0	0	0	0
P15	0	0	0	0	0	0	0	0	0	15	0	0	0	0	0	0	0	0	0	0	0	1	0	21	2	0	0	0	0	5	0	0	3	0	2	4	0	2	0	2	0	0	1	0	0	0	0	0	0
P16	0	0	0	0	0	2	0	0	0	2	0	0	0	8	0	0	0	4	0	0	3	7	0	14	0	0	1	0	0	0	4	2	10	0	3	8	0	0	2	0	0	0	0	0	0	0	0	2	0
P17	0	0	0	0	0	0	0	0	0	12	0	0	0	0	0	0	0	1	0	0	2	0	0	6	0	0	1	0	0	0	0	0	2	0	0	3	0	0	0	0	0	0	0	0	0	0	0	0	0
P18	0	1	0	0	0	0	0	0	2	14	1	0	0	0	0	0	0	6	0	2	0	0	0	2	0	0	1	2	0	0	2	0	8	0	2	3	6	0	0	0	0	0	0	0	0	0	0	1	0
P19	0	0	0	0	0	2	0	0	1	2	0	0	0	0	0	0	0	0	0	0	0	13	0	9	0	0	0	12	0	0	0	0	2	0	0	6	2	0	0	0	0	0	0	0	0	1	0	0	0
P20	0	0	0	0	7	0	0	0	0	3	0	0	0	0	0	0	0	0	0	0	20	0	0	0	0	0	0	0	0	0	0	0	0	0	0	5	0	0	0	0	0	0	0	0	0	0	0	0	0
P21	0	0	0	0	0	0	0	0	0	5	0	0	0	0	0	0	0	1	0	0	37	1	0	5	0	0	0	0	0	0	0	0	0	0	0	3	0	0	0	0	0	0	0	1	0	0	0	0	0
P22	0	0	0	0	0	0	0	0	0	5	0	0	0	0	0	0	0	0	0	0	4	1	0	0	0	0	0	0	0	0	0	2	0	0	0	3	0	3	0	0	0	0	0	0	0	0	0	0	0
P23	0	0	0	0	0	0	0	0	0	14	0	0	0	0	0	0	0	0	0	0	0	0	0	7	0	0	0	0	0	0	0	2	0	0	1	5	0	0	0	1	0	0	0	0	0	0	0	0	0
P24	0	0	0	0	0	0	0	0	0	9	0	0	0	0	0	0	0	3	0	0	9	0	0	12	1	0	1	0	0	0	0	1	2	0	0	5	0	0	0	0	0	0	0	0	0	0	0	0	0
P25	0	0	0	0	3	0	0	0	0	22	0	0	0	0	0	0	0	0	0	0	1	7	0	2	0	0	2	2	0	0	2	0	4	0	0	8	0	0	0	0	0	0	0	0	0	3	0	0	0
P26	0	0	0	0	0	0	0	0	0	9	0	0	0	0	0	0	0	0	0	0	26	2	0	6	0	0	0	0	0	1	0	0	0	0	0	6	0	1	0	0	0	0	0	0	0	0	0	0	0
P27	0	0	0	0	0	0	0	0	0	8	0	1	0	3	0	0	0	2	0	0	4	2	7	9	2	0	0	0	0	0	1	4	1	0	4	8	0	0	0	0	0	2	0	0	0	0	0	0	0
P28	0	0	0	0	0	0	0	0	0	22	0	0	0	0	0	0	0	0	0	0	0	1	0	5	0	0	0	0	0	0	0	0	4	0	0	4	0	0	1	0	0	0	0	0	0	0	0	0	0
P29	0	0	0	0	0	0	0	0	0	4	0	0	0	0	0	0	0	0	0	0	2	0	0	4	0	0	1	0	0	0	0	3	0	0	1	6	1	0	1	0	0	0	0	0	0	1	0	0	0
P30	0	0	0	0	1	7	0	0	1	8	0	0	0	0	0	0	0	0	0	0	0	1	5	9	17	0	5	2	0	0	0	0	8	0	0	9	0	0	17	0	0	0	0	0	0	0	0	0	0
P31	0	0	0	0	0	0	0	0	0	4	0	0	0	0	0	0	0	0	0	0	7	0	0	6	0	0	1	0	0	0	0	0	0	0	0	2	0	0	0	0	0	0	0	0	0	0	0	0	0
P32	0	0	0	0	0	0	0	0	0	11	0	0	0	0	0	0	0	1	0	0	13	0	0	0	4	0	0	0	0	0	1	0	0	0	0	3	0	0	2	0	0	0	0	0	0	2	0	0	0
P33	0	0	0	0	1	0	0	0	0	2	0	0	0	0	0	1	0	2	0	0	7	0	0	10	2	0	0	0	0	0	0	1	0	1	0	5	0	0	0	0	0	0	0	0	0	1	1	0	0
P34	0	0	0	0	0	2	0	0	0	10	0	0	0	0	0	0	0	1	0	0	16	1	0	3	0	0	1	0	1	0	0	0	5	0	0	5	3	0	1	0	0	0	0	0	0	0	0	0	0
P35	0	0	0	0	0	0	0	0	0	6	0	0	0	0	0	0	1	2	0	0	0	0	3	1	0	0	0	0	0	1	1	3	0	0	0	8	0	0	0	9	0	0	2	0	0	0	0	0	0
P36	0	0	0	0	0	0	0	0	0	16	0	0	0	0	0	0	0	0	0	0	6	0	0	0	0	0	1	0	0	0	0	0	0	0	0	6	0	0	0	0	0	0	0	0	0	0	0	0	0
P37	0	0	0	0	0	0	0	0	0	2	0	0	0	0	0	0	0	0	0	1	12	0	0	2	0	0	0	0	0	0	1	0	0	0	0	3	17	0	0	0	0	0	0	0	0	0	0	0	0
P38	0	0	2	0	0	0	0	0	0	2	0	0	0	0	0	0	0	0	0	0	11	0	0	1	0	0	0	0	0	0	0	1	2	0	0	2	1	0	2	0	0	0	0	0	0	2	0	0	0
P39	0	0	0	0	0	0	0	0	0	8	0	0	0	0	0	0	0	1	0	0	30	0	0	4	0	0	0	0	0	0	1	0	0	0	0	5	0	0	0	0	0	0	0	0	0	0	0	0	0
P40	2	0	5	1	0	0	0	0	0	7	0	0	0	0	0	0	0	2	2	0	0	0	1	4	0	0	2	0	4	0	1	4	0	0	0	12	4	0	0	0	3	0	0	0	0	1	0	0	1
P41	0	0	0	0	0	0	0	0	0	2	0	0	0	0	0	0	0	0	0	0	0	2	0	1	0	0	0	0	0	0	0	2	0	0	0	8	0	0	1	0	0	0	0	0	0	0	0	0	0
P42	0	0	0	0	0	0	0	0	0	4	0	0	0	0	0	0	0	0	0	0	7	0	0	1	0	0	0	0	0	0	0	1	0	0	0	0	0	0	0	0	0	0	0	0	0	0	0	0	0
P43	0	0	0	0	0	0	0	0	0	3	0	0	0	0	0	0	0	3	0	0	0	0	0	0	0	0	0	0	0	0	1	1	0	0	0	0	0	0	0	19	0	0	0	0	0	0	0	0	0
P44	32	0	0	0	0	0	0	0	0	6	0	0	0	0	0	0	0	0	0	0	18	0	0	4	0	0	0	0	0	0	2	0	2	0	0	5	0	0	0	0	0	0	0	0	0	3	0	0	0
P45	0	0	2	0	2	0	0	0	0	8	0	0	0	0	0	0	0	1	0	0	5	0	2	12	9	0	0	0	0	0	0	0	2	0	0	9	0	0	0	0	0	0	0	0	0	0	0	2	0
P46	0	0	0	0	6	2	0	0	0	10	0	0	0	0	0	0	0	4	0	0	9	1	0	5	0	0	0	20	0	0	2	2	12	0	0	9	0	0	0	0	0	0	0	0	0	0	0	0	0
P47	2	0	11	0	0	2	0	0	0	13	0	1	0	0	0	0	0	0	0	0	21	7	2	3	1	0	0	8	0	0	0	0	4	0	0	8	0	0	0	0	0	0	0	0	0	0	0	0	0
P48	0	0	0	0	2	0	0	0	0	30	0	0	2	0	0	0	0	0	0	0	0	0	8	9	0	2	0	0	0	0	0	0	14	0	0	3	6	0	0	0	4	0	0	0	0	0	0	0	0
P49	0	0	0	0	0	0	0	0	0	9	0	0	0	0	0	0	0	2	0	0	2	6	0	0	0	0	0	0	0	0	1	2	0	0	0	2	0	0	0	0	0	0	0	0	0	0	0	0	0
P50	4	1	1	0	0	0	2	0	0	2	0	0	0	0	0	0	0	0	0	0	0	0	0	1	0	0	0	2	0	0	0	2	0	0	0	6	0	0	1	4	2	0	0	0	0	1	0	0	0
P51	0	0	0	0	0	6	0	0	0	8	0	3	0	0	0	0	0	2	0	0	0	0	0	6	0	0	0	0	0	0	0	0	2	0	0	6	0	0	0	0	0	0	0	0	0	0	0	0	3
P52	0	0	0	0	5	0	0	0	0	32	0	0	0	0	0	0	0	0	0	0	34	2	0	11	0	0	0	0	0	0	2	0	2	0	0	6	1	0	0	0	0	0	0	0	3	1	0	0	0
P53	0	0	0	0	0	0	0	0	0	9	0	0	0	0	0	3	0	1	0	0	11	0	0	2	0	0	0	0	0	0	1	1	2	0	0	3	0	0	0	0	0	0	0	0	0	0	0	0	0
P54	2	0	0	0	0	0	0	0	0	9	0	0	0	0	0	0	0	4	0	0	2	0	1	8	0	0	1	0	0	0	0	0	2	0	0	7	0	0	0	0	0	0	0	0	0	0	0	0	0
P55	0	0	0	0	11	0	0	1	0	10	0	1	0	0	1	0	0	4	0	0	1	2	0	5	2	0	0	0	0	0	1	0	2	0	0	10	0	0	0	0	0	0	0	0	0	0	0	0	0
P56	0	0	0	0	0	0	0	0	0	9	0	0	0	0	0	0	0	4	0	0	6	2	0	0	0	0	0	10	0	0	1	3	0	0	0	4	0	0	0	0	0	0	0	0	0	5	0	0	0
P57	0	0	0	0	0	0	0	0	0	1	0	0	0	0	0	0	0	2	0	0	9	2	0	7	0	0	0	0	0	0	2	0	0	0	0	8	0	0	0	0	1	0	0	0	0	3	0	0	0
P58	0	2	0	0	0	0	0	0	1	0	0	0	0	0	0	0	0	0	0	0	40	0	0	0	0	0	0	0	0	0	0	0	0	0	0	0	0	0	0	0	0	0	0	0	0	0	0	0	0
P59	0	0	0	0	2	0	0	0	0	20	0	3	0	0	0	0	0	2	0	0	9	5	0	13	0	0	0	4	0	0	2	0	0	0	0	9	0	0	2	0	0	0	0	0	0	0	0	0	0
P60	0	0	0	0	5	2	0	0	0	6	0	1	0	0	0	0	0	0	0	0	4	2	0	1	0	0	0	0	0	0	0	0	4	0	2	1	0	0	0	0	0	0	0	0	0	0	0	0	0
P61	0	0	0	0	0	0	0	0	0	5	0	1	0	0	0	0	0	0	0	0	3	2	0	18	0	0	1	0	0	0	0	2	0	0	0	7	0	0	1	0	3	0	0	0	0	2	0	0	0
[truncated: 39 more columns]
